# Supplementary material for: Cyclen based bis-macrocyclic ligands as phosphates receptors. A potentiometric and NMR study
Source: Royal Society of Chemistry journal article supplement (doi:10.1039/b507819a), 2005-01-01

---

## **Cyclen based bis-macrocyclic ligands as phosphates receptors. A potentiometric and NMR study**

---

**Stéphanie Develay,<sup>a</sup> Raphaël Tripier<sup>a</sup>, Michel Le Baccon<sup>a</sup>, Véronique Patinec<sup>a</sup>, Guy Serratrice<sup>b</sup>  
and Henri Handel\*<sup>a</sup>**

<sup>a</sup> UMR CNRS 6521, "Chimie, Electrochimie Moléculaire et Analytique", Université de Bretagne Occidentale, C. S. 93837, 6 avenue Victor Le Gorgeu, 29238 Brest Cedex 3, France. Fax: 33 2 98016138; Tel: 33 2 9801700; E-Mail: [Henri.Handel@univ-brest.fr](mailto:Henri.Handel@univ-brest.fr).

<sup>b</sup> UMR CNRS 5616, Université Joseph Fourier, LEDSS, B.P. 53, 38041, Grenoble cedex 9, France.

**Electronic Supplementary material.**

### Selectivity diagrams with *BOC*

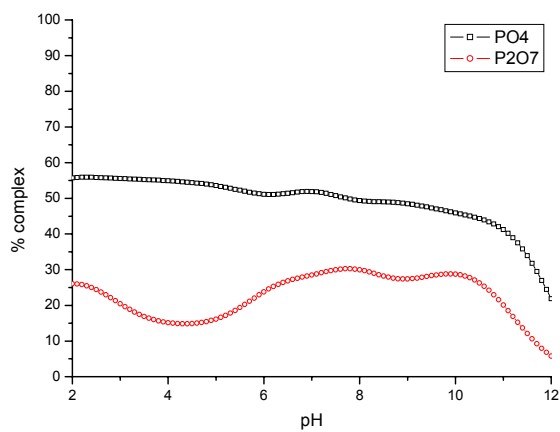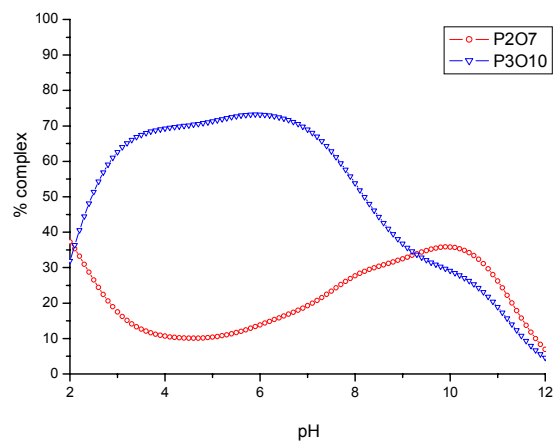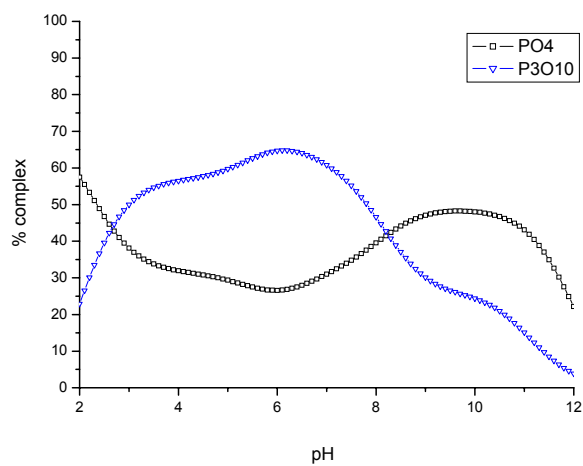

### Selectivity diagrams with *BMC*

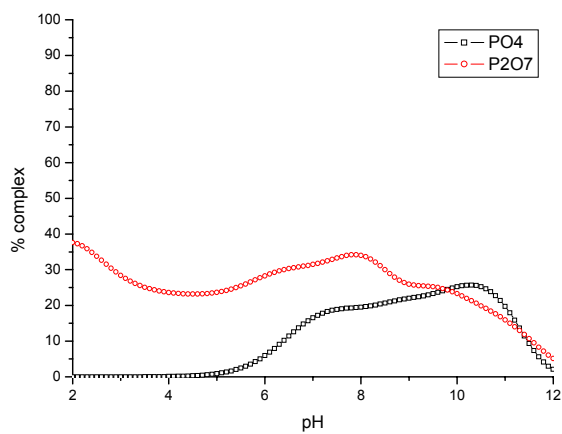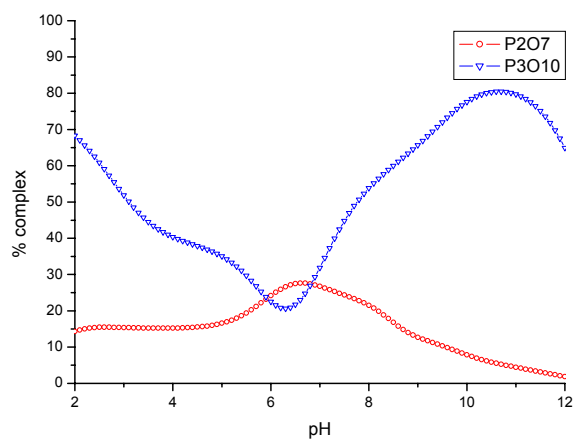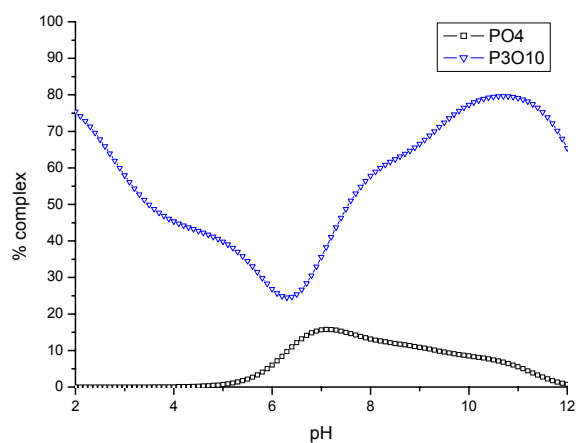

### Selectivity diagrams with *BPC*

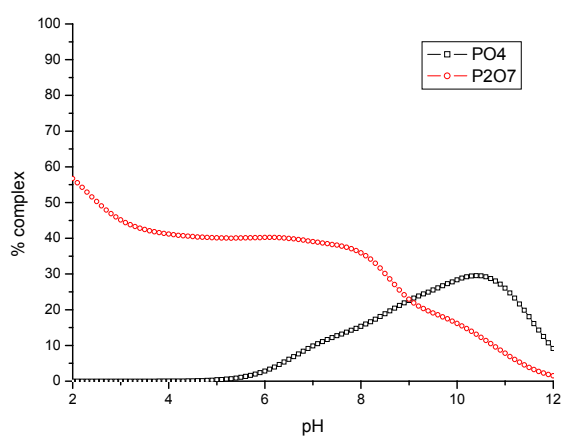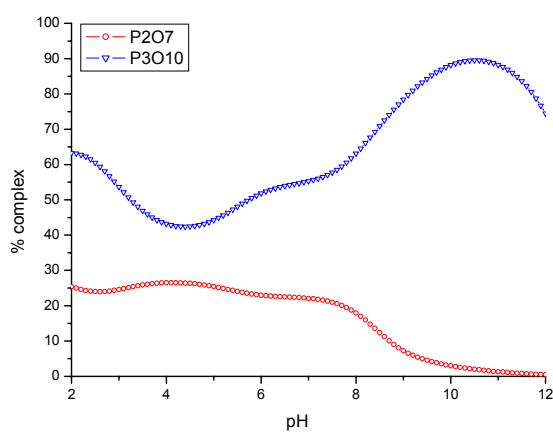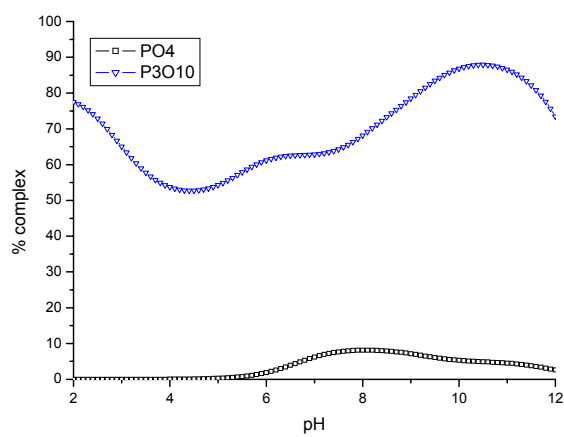



### Selectivity diagrams with *BPyC*

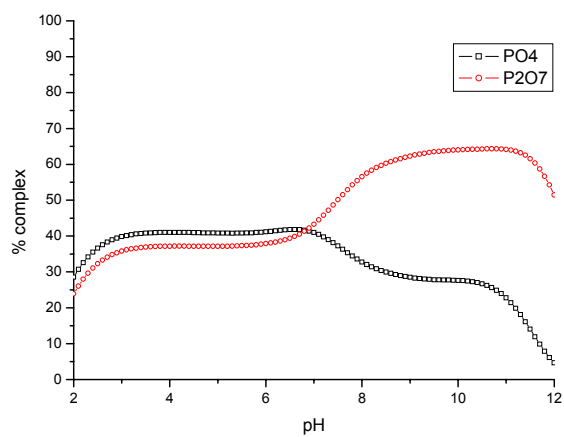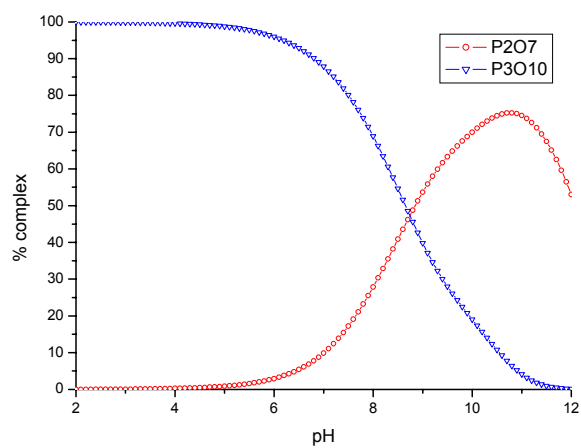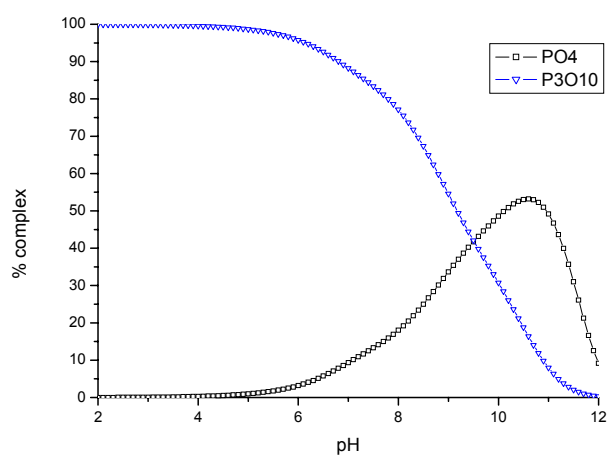

### Competitive diagrams between 2 ligands for orthophosphate

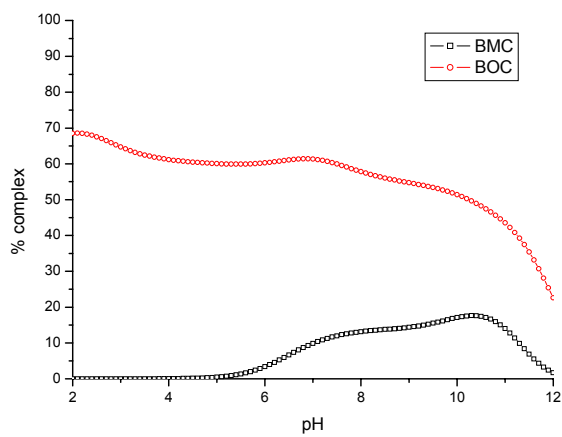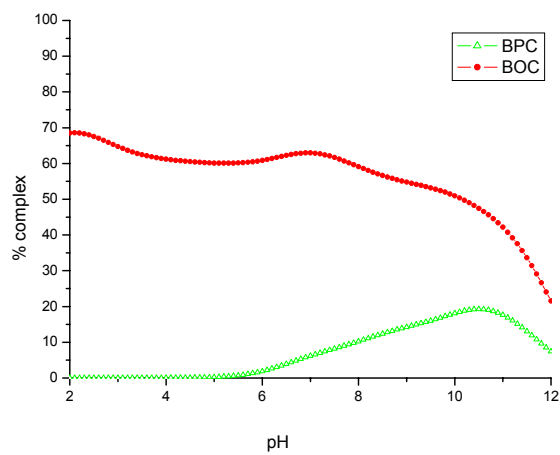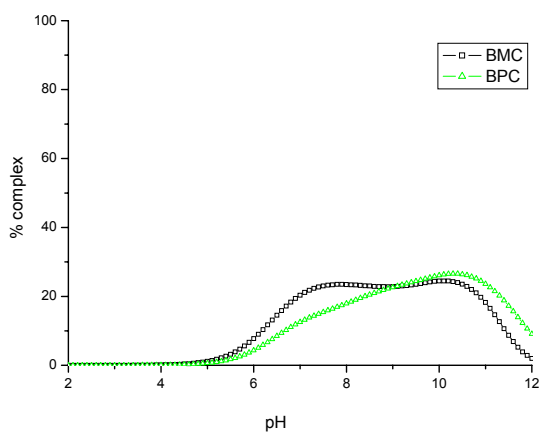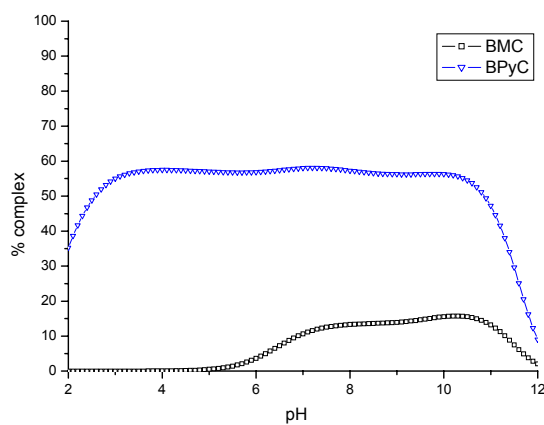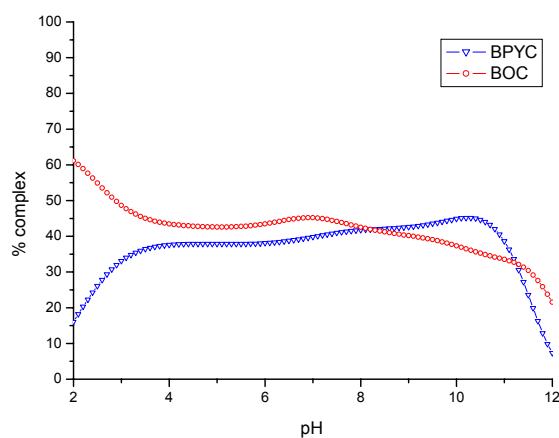

### Competitive diagrams between 2 ligands for pyrophosphate

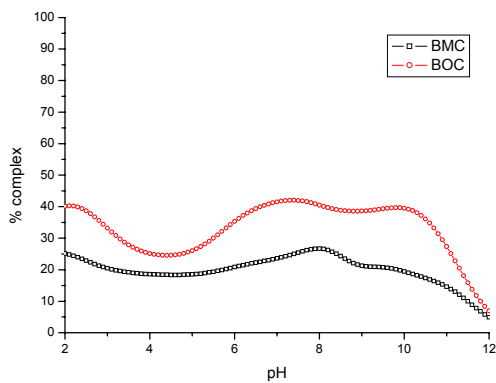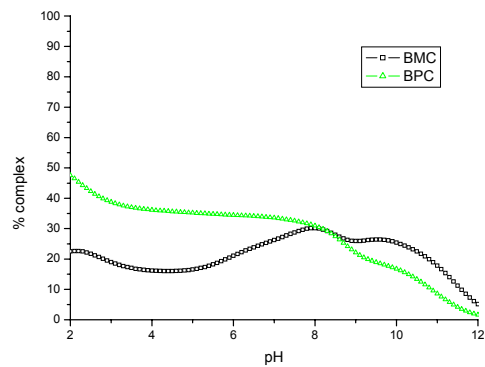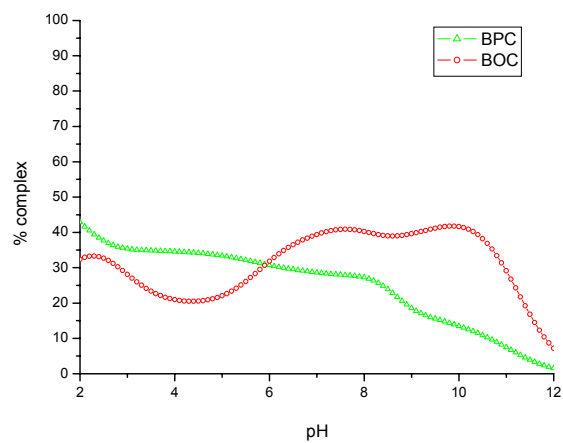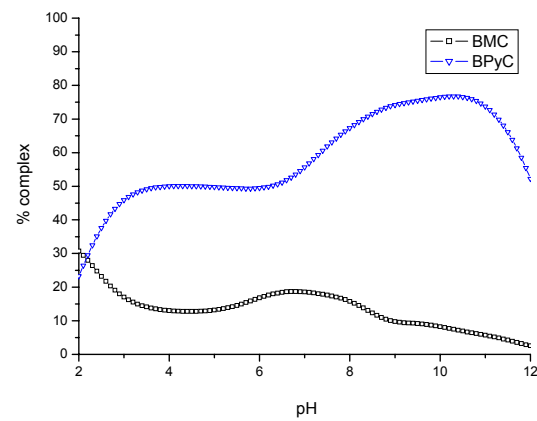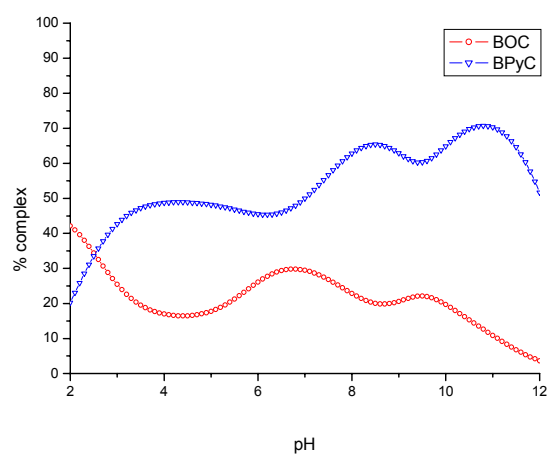



### Competitive diagrams between 2 ligands for triphosphate

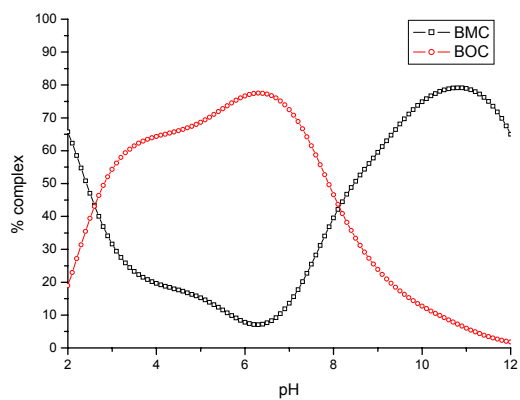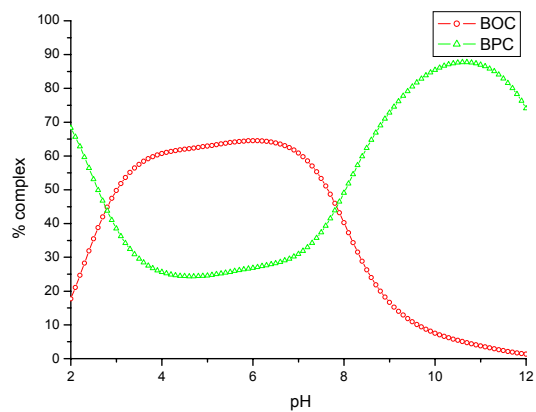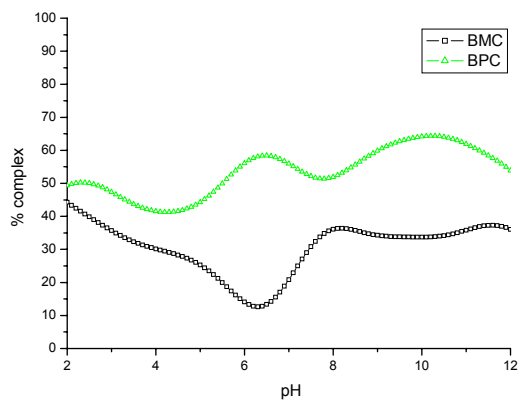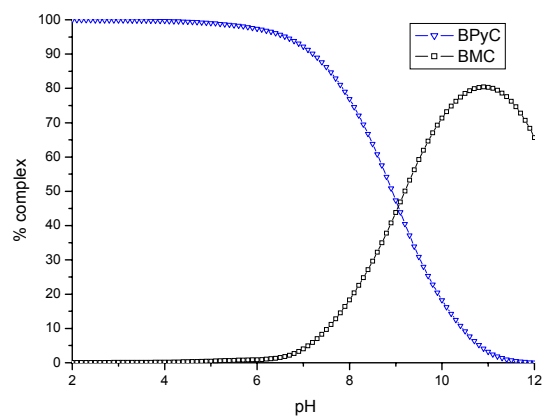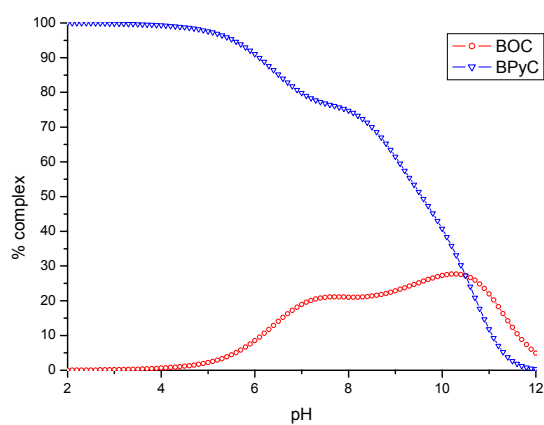

Supplement: b507819a.pdf [file b507819a.pdf]
